# Supplementary material for: A facile construction of gradient micro-patterned OCP coatings on medical titanium for high throughput evaluation of biocompatibility
Source: Royal Society of Chemistry journal article supplement (doi:10.1039/c6tb00458j), 2016-01-01
Supplement: c6tb00458j1.pdf [file c6tb00458j1.pdf]

|                              | Static    | Dynamic CA (°)  |             | Surface Energy (mJ/m <sup>2</sup> ) |           |             | Water Collection |
|------------------------------|-----------|-----------------|-------------|-------------------------------------|-----------|-------------|------------------|
|                              | CA (°)    |                 |             | Total                               | Polar     | Dispersive  | Rate (ml/min)    |
|                              |           | Advancing<br>CA | Receding CA |                                     |           |             |                  |
| Superhydrophobic<br>Surfaces | 162.3±2.3 | 163.5±1.4       | 161.8±1.1   | 0.93±0.02                           | 0.92±0.01 | 0.01±0.01   | 9.1±1.1          |
| OCP-1                        | 6.1±1.7   | -               | -           | 118.18±1.55                         | 1.01±0.12 | 117.17±1.48 | 32.3±0.5         |
| OCP-2                        | 8.3±2.5   | -               | -           | 121.66±2.35                         | 1.51±0.83 | 120.15±2.01 | 33.1±1.8         |
| OCP-3                        | 9.4±0.9   | -               | -           | 115.68±3.58                         | 1.32±0.67 | 114.36±3.24 | 32.8±2.6         |
| OCP-4                        | 10.9±1.4  | -               | -           | 110.04±2.47                         | 0.95±0.08 | 109.19±2.33 | 30.7±3.2         |

Table S1. The results of the static water contact angle, the surface energy and the water collection rate of the superhydrophobic surfaces and each of the OCP surfaces and the dynamic contact angle result of the superhydrophobic surfaces.
