# Supplementary material for: A facile construction of gradient micro-patterned OCP coatings on medical titanium for high throughput evaluation of biocompatibility
Source: Royal Society of Chemistry journal article supplement (doi:10.1039/c6tb00458j), 2016-01-01
Supplement: c6tb00458j2.pdf [file c6tb00458j2.pdf]

|                           | Static Contact Angle (°) |                 |                          |
|---------------------------|--------------------------|-----------------|--------------------------|
|                           | Untreated                | Soaked in Water | Soaked in Culture Medium |
| Superhydrophobic Surfaces | 162.3±2.3                | 159.2±3.0       | 156.1±3.8                |
| OCP-1                     | 6.1±0.7                  | 7.5±1.1         | 9.1±0.9                  |
| OCP-2                     | 8.3±0.5                  | 8.1±0.9         | 10.4±2.3                 |
| OCP-3                     | 9.4±0.9                  | 8.7±1.5         | 9.7±1.8                  |
| OCP-4                     | 11.9±1.4                 | 12.5±2.2        | 14.5±0.8                 |

Table S2. The results of the static water contact angle of the superhydrophobic surfaces and each of the OCP surfaces after soaking in water for 3 days, soaking in cell culture medium for 3 days and untreated.
